# Supplementary material
Source: ML conference proceedings conference paper supplement (https://proceedings.mlr.press/v89/zhao19a.html)
Supplement: Supplementary file [file zhao19a-supp.pdf]

# Supplemental Material to “An Optimal Algorithm for Stochastic Three-Composite Optimization”

Renbo Zhao, William B. Haskell, Vincent Y. F. Tan

## S-1 Lemmas

We provide some lemmas that will be used in proving Proposition 1.

**Lemma S-1.** *Let  $\{\vartheta_k\}_{k \in \mathbb{Z}^+}$  and  $\{\vartheta'_k\}_{k \in \mathbb{Z}^+}$  be any positive sequences and  $\mathcal{X} \subseteq \mathbb{R}^d$  be convex and closed. Define a sequence of iterates  $\{\mathbf{x}_\natural^k\}_{k \in \mathbb{Z}^+}$  such that  $\mathbf{x}_\natural^0 \triangleq \mathbf{x}^0$  and*

$$\mathbf{x}_\natural^{k+1} \triangleq \Pi_{\mathcal{X}} [\mathbf{x}_\natural^k + \vartheta_k \boldsymbol{\varepsilon}^k], \quad \forall k \in \mathbb{Z}^+,$$

where  $\Pi_{\mathcal{X}}$  denotes the Euclidean projection onto  $\mathcal{X}$  and the sequence  $\{\boldsymbol{\varepsilon}^k\}_{k \in \mathbb{Z}^+}$  is defined in Assumption 1. Then

$$\sum_{k=0}^{K-1} \vartheta'_k \langle \boldsymbol{\varepsilon}^k, \mathbf{x} - \mathbf{x}_\natural^k \rangle \leq \frac{\vartheta'_0}{2\vartheta_0} \|\mathbf{x}_\natural^0 - \mathbf{x}\|^2 + \sum_{k=1}^{K-1} \left( \frac{\vartheta'_k}{2\vartheta_k} - \frac{\vartheta'_{k-1}}{2\vartheta_{k-1}} \right) \|\mathbf{x}_\natural^k - \mathbf{x}\|^2 + \sum_{k=0}^{K-1} \frac{\vartheta'_k \vartheta_k}{2} \|\boldsymbol{\varepsilon}^k\|^2, \quad \forall K \in \mathbb{N}. \quad (\text{S-1})$$

*Proof.* By the nonexpansiveness of  $\Pi_{\mathcal{X}}$ , for any  $\mathbf{x} \in \mathcal{X}$  and  $k \in \mathbb{Z}^+$ , we have

$$\begin{aligned} \frac{1}{2} \|\mathbf{x}_\natural^{k+1} - \mathbf{x}\|^2 &= \frac{1}{2} \|\Pi_{\mathcal{X}} [\mathbf{x}_\natural^k + \vartheta_k \boldsymbol{\varepsilon}^k] - \Pi_{\mathcal{X}} [\mathbf{x}]\|^2 \\ &\leq \frac{1}{2} \|\mathbf{x}_\natural^k - \mathbf{x} + \vartheta_k \boldsymbol{\varepsilon}^k\|^2 = \frac{1}{2} \|\mathbf{x}_\natural^k - \mathbf{x}\|^2 + \frac{\vartheta_k^2}{2} \|\boldsymbol{\varepsilon}^k\|^2 + \vartheta_k \langle \mathbf{x}_\natural^k - \mathbf{x}, \boldsymbol{\varepsilon}^k \rangle. \end{aligned} \quad (\text{S-2})$$

Now, multiply both sides of (S-2) by  $\vartheta'_k/\vartheta_k$  and telescope over  $k = 0, \dots, K-1$ , we have

$$\begin{aligned} 0 &\leq \frac{\vartheta'_{K-1}}{2\vartheta_{K-1}} \|\mathbf{x}^K - \mathbf{x}\|^2 \\ &\leq \frac{\vartheta'_0}{2\vartheta_0} \|\mathbf{x}_\natural^0 - \mathbf{x}\|^2 + \sum_{k=1}^{K-1} \left( \frac{\vartheta'_k}{2\vartheta_k} - \frac{\vartheta'_{k-1}}{2\vartheta_{k-1}} \right) \|\mathbf{x}_\natural^k - \mathbf{x}\|^2 + \sum_{k=0}^{K-1} \frac{\vartheta'_k \vartheta_k}{2} \|\boldsymbol{\varepsilon}^k\|^2 + \sum_{k=0}^{K-1} \vartheta'_k \langle \boldsymbol{\varepsilon}^k, \mathbf{x}_\natural^k - \mathbf{x} \rangle. \end{aligned}$$

After rearranging, we arrive at (S-1).  $\square$

**Lemma S-2.** *Choose the input sequences  $\{\beta_k\}_{k \in \mathbb{Z}^+}$ ,  $\{\alpha_k\}_{k \in \mathbb{Z}^+}$ ,  $\{\tau_k\}_{k \in \mathbb{Z}^+}$  and  $\{\theta_k\}_{k \in \mathbb{Z}^+}$  in Algorithm 1 as in Section 2. If  $\text{dom } g$  and  $\text{dom } h^*$  are closed and bounded, then for any  $K \in \mathbb{N}$ ,*

$$\begin{aligned} G(\bar{\mathbf{x}}^K, \bar{\mathbf{y}}^K) &\leq \frac{1}{\beta_{K-1} \tau_{K-1}} D_g^2 + \frac{1}{2\beta_{K-1} \alpha_{K-1}} D_{h^*}^2 \\ &\quad + \frac{1}{\beta_{K-1} \gamma_{K-1}} \sum_{k=0}^{K-1} \gamma_k \langle \boldsymbol{\varepsilon}^k, \mathbf{x}_\natural^k - \mathbf{x}^k \rangle + \frac{1 + \zeta}{2\zeta \beta_{K-1} \gamma_{K-1}} \sum_{k=0}^{K-1} \gamma_k \tau_k \|\boldsymbol{\varepsilon}^k\|^2 \text{ a.s.} \end{aligned} \quad (\text{S-3})$$

*Proof.* See Section S-4.  $\square$

**Lemma S-3.** *Let  $\{\bar{\sigma}_k\}_{k \in \mathbb{Z}^+}$  be any positive sequence. Let  $\{\delta_k\}_{k \in \mathbb{Z}^+} \subseteq \mathbb{R}$  be an martingale difference sequence (MDS) adapted to a filtration  $\{\mathcal{F}'_k\}_{k \in \mathbb{Z}^+}$  such that for any  $k \in \mathbb{Z}^+$ ,  $\mathbb{E}[\delta_k | \mathcal{F}'_k] = 0$  and  $\mathbb{E}[\exp\{\delta_k^2/\bar{\sigma}_k^2\} | \mathcal{F}'_k] \leq \exp\{1\}$  a.s. Then for any  $p > 0$  and  $K \in \mathbb{N}$ ,*

$$\Pr \left( \sum_{k=0}^{K-1} \delta_k > p \sqrt{\sum_{k=0}^{K-1} \bar{\sigma}_k^2} \right) \leq \exp \left\{ -\frac{p^2}{4} \right\}. \quad (\text{S-4})$$

*Proof.* See [1, Section 6].  $\square$

## S-2 Proof of Proposition 1

By the independence of  $\boldsymbol{\varepsilon}^k$  and  $\{\mathbf{x}_q^k, \mathbf{x}^k\}$  for any  $k \in \mathbb{Z}^+$  and (A1), we have

$$\mathbb{E}_{\boldsymbol{\xi}^k} [\langle \boldsymbol{\varepsilon}^k, \mathbf{x}_q^k - \mathbf{x}^k \rangle | \mathcal{F}_k] = 0, \quad \forall K \in \mathbb{N}. \quad (\text{S-5})$$

Therefore,

$$\mathbb{E}_{\Xi_K} \left[ \sum_{k=0}^{K-1} \gamma_k \langle \boldsymbol{\varepsilon}^k, \mathbf{x}_q^k - \mathbf{x}^k \rangle \right] = \sum_{k=0}^{K-1} \gamma_k \mathbb{E} [\mathbb{E}_{\boldsymbol{\xi}^k} [\langle \boldsymbol{\varepsilon}^k, \mathbf{x}_q^k - \mathbf{x}^k \rangle | \mathcal{F}_k]] = 0. \quad (\text{S-6})$$

By (A2), we also have

$$\mathbb{E}_{\Xi_K} \left[ \sum_{k=0}^{K-1} \gamma_k \tau_k \|\boldsymbol{\varepsilon}^k\|^2 \right] = \sum_{k=0}^{K-1} \gamma_k \tau_k \mathbb{E} [\mathbb{E}_{\boldsymbol{\xi}^k} [\|\boldsymbol{\varepsilon}^k\|^2 | \mathcal{F}_k]] = \left( \sum_{k=0}^{K-1} \gamma_k \tau_k \right) \sigma^2. \quad (\text{S-7})$$

Therefore, by combining (S-3), (S-6) and (S-7), we obtain (22).

We next prove (23). By (S-5), (A2) and the boundedness of  $\mathbf{dom} g$ , we see that  $\{\gamma_k \langle \boldsymbol{\varepsilon}^k, \mathbf{x}_q^k - \mathbf{x}^k \rangle\}_{k \in \mathbb{Z}^+}$  is a MDS adapted to  $\{\mathcal{F}_k\}_{k \in \mathbb{Z}^+}$ . In addition, by Cauchy-Schwartz and (A3),

$$\mathbb{E}_{\boldsymbol{\xi}^k} \left[ \exp \left\{ \frac{\gamma_k^2 |\langle \boldsymbol{\varepsilon}^k, \mathbf{x}_q^k - \mathbf{x}^k \rangle|^2}{4\gamma_k^2 \sigma^2 D_g^2} \right\} \middle| \mathcal{F}_k \right] \leq \exp\{1\}. \quad (\text{S-8})$$

Then we invoke Lemma S-3 to obtain that for any  $p > 0$ ,

$$\Pr \left\{ \frac{1}{\beta_{K-1} \gamma_{K-1}} \sum_{k=0}^{K-1} \gamma_k \langle \boldsymbol{\varepsilon}^k, \mathbf{x}_q^k - \mathbf{x}^k \rangle > \frac{2p\sigma D_g}{\beta_{K-1} \gamma_{K-1}} \sqrt{\sum_{k=0}^{K-1} \gamma_k^2} \right\} \quad (\text{S-9})$$

$$= \Pr \left\{ \sum_{k=0}^{K-1} \gamma_k \langle \boldsymbol{\varepsilon}^k, \mathbf{x}_q^k - \mathbf{x}^k \rangle > p \sqrt{\sum_{k=0}^{K-1} 4\gamma_k^2 \sigma^2 D_g^2} \right\} \leq \exp\{-p^2/4\}. \quad (\text{S-10})$$

Recall from Proposition 1 that  $\Gamma_K = \sum_{k=0}^{K-1} \gamma_k \tau_k$ , for any  $K \in \mathbb{N}$ . Then by Jensen's inequality and (A3), for any  $p' > 0$ ,

$$\mathbb{E}_{\Xi_K} \left[ \exp \left\{ \frac{p'}{2\Gamma_K} \sum_{k=0}^{K-1} \gamma_k \tau_k \frac{\|\boldsymbol{\varepsilon}^k\|^2}{\sigma^2} \right\} \right] \leq \frac{1}{\Gamma_K} \sum_{k=0}^{K-1} \gamma_k \tau_k \mathbb{E} \left[ \mathbb{E}_{\boldsymbol{\xi}^k} \left[ \exp \left\{ \frac{p' \|\boldsymbol{\varepsilon}^k\|^2}{2\sigma^2} \right\} \middle| \mathcal{F}_k \right] \right] \leq \exp\{p'/2 + (p')^2/4\}. \quad (\text{S-11})$$

Therefore, for any  $p' > 0$ ,

$$\begin{aligned} & \Pr \left\{ \frac{1 + \zeta}{2\zeta \beta_{K-1} \gamma_{K-1}} \sum_{k=0}^{K-1} \gamma_k \tau_k \|\boldsymbol{\varepsilon}^k\|^2 > (1 + p') \frac{\sigma^2(1 + \zeta)}{2\zeta \beta_{K-1} \gamma_{K-1}} \Gamma_K \right\} \\ &= \Pr \left\{ \exp \left\{ \frac{p'}{2\Gamma_K} \sum_{k=0}^{K-1} \gamma_k \tau_k \frac{\|\boldsymbol{\varepsilon}^k\|^2}{\sigma^2} \right\} > \exp\{p'(1 + p')/2\} \right\} \\ &\leq \mathbb{E}_{\Xi_K} \left[ \exp \left\{ \frac{p'}{2\Gamma_K} \sum_{k=0}^{K-1} \gamma_k \tau_k \frac{\|\boldsymbol{\varepsilon}^k\|^2}{\sigma^2} \right\} \right] \exp\{-p'(1 + p')/2\} \leq \exp\{-(p')^2/4\}, \end{aligned} \quad (\text{S-12})$$

where (S-12) follows from Markov's inequality and (S-11).

Recall from Proposition 1 that  $\Gamma'_K \triangleq (\sum_{k=0}^{K-1} \gamma_k^2)^{1/2}$ . Based on (S-3), (S-10) and (S-12), we have that for any  $p, p' > 0$ ,

$$\begin{aligned} \Pr \left\{ G(\bar{\mathbf{x}}^K, \bar{\mathbf{y}}^K) > \frac{D_g^2}{\beta_{K-1} \tau_{K-1}} + \frac{D_{h^*}^2}{2\beta_{K-1} \alpha_{K-1}} + \frac{2p\sigma D_g}{\beta_{K-1} \gamma_{K-1}} \Gamma'_K \right. \\ \left. + (1 + p') \frac{\sigma^2(1 + \zeta)}{2\zeta \beta_{K-1} \gamma_{K-1}} \Gamma_K \right\} \leq \exp\{-p^2/4\} + \exp\{-(p')^2/4\}. \end{aligned} \quad (\text{S-13})$$

Taking  $p = p' = 2\sqrt{\log(2/\delta)}$ , we then complete the proof.

### S-3 Proof of Theorem 1

First, we easily see that the conditions on  $\{\beta_k\}_{k \in \mathbb{Z}^+}$ ,  $\{\alpha_k\}_{k \in \mathbb{Z}^+}$ ,  $\{\tau_k\}_{k \in \mathbb{Z}^+}$  and  $\{\theta_k\}_{k \in \mathbb{Z}^+}$  in Proposition 1 are all satisfied with  $\zeta = 1/2$ . In particular, for any  $k \in \mathbb{N}$ ,

$$\frac{1}{2\tau_{k-1}} - \frac{L}{\beta_{k-1}} - B^2\alpha_{k-1} = \frac{2}{k+1}L + \frac{\rho\sigma}{2}\sqrt{k+1} - \frac{2(k+1)}{k(k+3)}L = \frac{2(k-1)}{k(k+1)(k+3)}L + \frac{\rho\sigma}{2}\sqrt{k+1} \geq 0.$$

From (22), we have

$$\begin{aligned} \mathbb{E}_{\Xi^K} [G(\bar{\mathbf{x}}^K, \bar{\mathbf{y}}^K)] &\stackrel{(a)}{\leq} \frac{2(K+1)}{K(K+3)} \left\{ \left( \frac{4L}{K+1} + 2\rho'B + \rho\sigma\sqrt{K+1} \right) D_g^2 + \frac{B}{2\rho'} D_{h^*}^2 + \frac{3}{2\rho K} \left( \sum_{k=1}^K \sqrt{k} \right) \sigma \right\} \\ &\stackrel{(b)}{\leq} \frac{8L}{K(K+3)} D_g^2 + \frac{4(K+1)}{K(K+3)} \left( \rho' D_g^2 + \frac{D_{h^*}^2}{4\rho'} \right) B + \frac{2(K+1)^{3/2}}{K(K+3)} \left( \rho D_g^2 + \frac{2}{\rho} \right) \sigma. \end{aligned}$$

where in (a) we use  $\tau_k \leq 1/(\rho\sigma\sqrt{k+1})$  for any  $k \in \mathbb{Z}^+$  and in (b) we use  $\sum_{k=1}^K \sqrt{k} \leq (2/3)(K+1)^{3/2}$  for any  $K \in \mathbb{N}$ .

In addition, in (23), we have

$$\begin{aligned} &\frac{4\sqrt{\log(2/\delta)}D_g}{\beta_{K-1}\gamma_{K-1}} \sqrt{\sum_{k=0}^{K-1} \gamma_k^2 \sigma} + \frac{(1+2\sqrt{\log(2/\delta)})(1+\zeta)}{2\zeta\beta_{K-1}\gamma_{K-1}} \left( \sum_{k=0}^{K-1} \gamma_k \tau_k \right) \sigma^2 \\ &\stackrel{(c)}{\leq} \frac{2(K+1)}{K(K+3)} \left\{ 4\sqrt{K \log(2/\delta)} D_g + \frac{1+2\sqrt{\log(2/\delta)}}{\rho K} (K+1)^{3/2} \right\} \sigma \\ &\leq \frac{8(K+1)^{3/2}}{K(K+3)} \left( \sqrt{\log(2/\delta)} D_g + \frac{1/2 + \sqrt{\log(2/\delta)}}{\rho} \right) \sigma \stackrel{(d)}{\leq} \frac{16}{\sqrt{K+3}} \left( D_g + \frac{2}{\rho} \right) \sqrt{\log(2/\delta)} \sigma, \end{aligned} \quad (\text{S-14})$$

where in (c) we use  $\sum_{k=1}^K k^2 \leq K^3$  for any  $K \in \mathbb{N}$  and in (d) we use  $\delta \in (0, 1)$ .

### S-4 Proof of Lemma S-2

For any  $k \in \mathbb{N}$ , from steps (5) and (6) and the first-order optimality conditions, we have

$$\alpha_k^{-1}(\mathbf{y}^k - \mathbf{y}^{k+1}) + \mathbf{A}\mathbf{z}^k \in \partial h^*(\mathbf{y}^{k+1}), \quad (\text{S-15})$$

$$\tau_k^{-1}(\mathbf{x}^k - \mathbf{x}^{k+1}) - (\mathbf{v}^k + \mathbf{A}^T \mathbf{y}^{k+1}) \in \partial g(\mathbf{x}^{k+1}). \quad (\text{S-16})$$

Using the definitions of subdifferential and law of cosines, for any  $\mathbf{x} \in \mathbb{R}^d$  and  $\mathbf{y} \in \mathbb{R}^m$ ,

$$h^*(\mathbf{y}) \geq h^*(\mathbf{y}^{k+1}) + \frac{1}{2\alpha_k} (\|\mathbf{y}^k - \mathbf{y}^{k+1}\|^2 + \|\mathbf{y}^{k+1} - \mathbf{y}\|^2 - \|\mathbf{y}^k - \mathbf{y}\|^2) + \langle \mathbf{A}\mathbf{z}^k, \mathbf{y} - \mathbf{y}^{k+1} \rangle, \quad (\text{S-17})$$

$$\begin{aligned} g(\mathbf{x}) &\geq g(\mathbf{x}^{k+1}) + \frac{1}{2\tau_k} (\|\mathbf{x}^k - \mathbf{x}^{k+1}\|^2 + \|\mathbf{x}^{k+1} - \mathbf{x}\|^2 - \|\mathbf{x}^k - \mathbf{x}\|^2) \\ &\quad + \langle \boldsymbol{\varepsilon}^k, \mathbf{x}^{k+1} - \mathbf{x} \rangle + \langle \nabla f(\tilde{\mathbf{x}}^k), \mathbf{x}^{k+1} - \mathbf{x} \rangle + \langle \mathbf{A}(\mathbf{x}^{k+1} - \mathbf{x}), \mathbf{y}^{k+1} \rangle. \end{aligned} \quad (\text{S-18})$$

In addition, from steps (4) and (8), we have  $\bar{\mathbf{x}}^{k+1} - \tilde{\mathbf{x}}^k = \beta_k^{-1}(\mathbf{x}^{k+1} - \mathbf{x}^k)$  and for any  $\mathbf{x} \in \mathbb{R}^d$ ,

$$\begin{aligned}
& (\beta_k - 1)f(\bar{\mathbf{x}}^k) + f(\mathbf{x}) \\
& \geq (\beta_k - 1) \left( f(\tilde{\mathbf{x}}^k) + \langle \nabla f(\tilde{\mathbf{x}}^k), \bar{\mathbf{x}}^k - \tilde{\mathbf{x}}^k \rangle \right) + f(\tilde{\mathbf{x}}^k) + \langle \nabla f(\tilde{\mathbf{x}}^k), \mathbf{x} - \tilde{\mathbf{x}}^k \rangle \\
& = \beta_k f(\tilde{\mathbf{x}}^k) + (\beta_k - 1) \langle \nabla f(\tilde{\mathbf{x}}^k), \bar{\mathbf{x}}^k - \tilde{\mathbf{x}}^k \rangle + \langle \nabla f(\tilde{\mathbf{x}}^k), \mathbf{x}^{k+1} - \tilde{\mathbf{x}}^k \rangle + \langle \nabla f(\tilde{\mathbf{x}}^k), \mathbf{x} - \mathbf{x}^{k+1} \rangle \\
& = \beta_k \left( f(\tilde{\mathbf{x}}^k) + (1 - \beta_k^{-1}) \langle \nabla f(\tilde{\mathbf{x}}^k), \bar{\mathbf{x}}^k - \tilde{\mathbf{x}}^k \rangle + \beta_k^{-1} \langle \nabla f(\tilde{\mathbf{x}}^k), \mathbf{x}^{k+1} - \tilde{\mathbf{x}}^k \rangle \right) + \langle \nabla f(\tilde{\mathbf{x}}^k), \mathbf{x} - \mathbf{x}^{k+1} \rangle \\
& \geq \beta_k \left( f(\bar{\mathbf{x}}^{k+1}) - (L/2) \|\bar{\mathbf{x}}^{k+1} - \tilde{\mathbf{x}}^k\|^2 \right) + \langle \nabla f(\tilde{\mathbf{x}}^k), \mathbf{x} - \mathbf{x}^{k+1} \rangle \\
& = \beta_k f(\bar{\mathbf{x}}^{k+1}) - \frac{L}{2\beta_k} \|\mathbf{x}^{k+1} - \mathbf{x}^k\|^2 + \langle \nabla f(\tilde{\mathbf{x}}^k), \mathbf{x} - \mathbf{x}^{k+1} \rangle.
\end{aligned} \tag{S-19}$$

From (S-19), we immediately see that

$$\beta_k (f(\bar{\mathbf{x}}^{k+1}) - f(\mathbf{x})) \leq (\beta_k - 1) (f(\bar{\mathbf{x}}^k) - f(\mathbf{x})) + \frac{L}{2\beta_k} \|\mathbf{x}^{k+1} - \mathbf{x}^k\|^2 + \langle \nabla f(\tilde{\mathbf{x}}^k), \mathbf{x}^{k+1} - \mathbf{x} \rangle. \tag{S-20}$$

Also, by Jensen's inequality, we have for any  $\mathbf{x} \in \mathbb{R}^d$  and  $\mathbf{y} \in \mathbb{R}^m$ ,

$$g(\bar{\mathbf{x}}^{k+1}) - g(\mathbf{x}) \leq \beta_k^{-1} (g(\mathbf{x}^{k+1}) - g(\mathbf{x})) + (1 - \beta_k^{-1}) (g(\bar{\mathbf{x}}^k) - g(\mathbf{x})), \tag{S-21}$$

$$h^*(\bar{\mathbf{y}}^{k+1}) - h^*(\mathbf{y}) \leq \beta_k^{-1} (h^*(\mathbf{y}^{k+1}) - h^*(\mathbf{y})) + (1 - \beta_k^{-1}) (h^*(\bar{\mathbf{y}}^k) - h^*(\mathbf{y})). \tag{S-22}$$

For convenience, for any  $k \in \mathbb{Z}^+$ ,  $\mathbf{x} \in \mathbb{R}^d$  and  $\mathbf{y} \in \mathbb{R}^m$ , define  $\bar{\mathbf{w}}^k \triangleq (\bar{\mathbf{x}}^k, \bar{\mathbf{y}}^k)$  and  $\mathbf{w} \triangleq (\mathbf{x}, \mathbf{y})$ . Accordingly, define

$$\begin{aligned}
Q(\bar{\mathbf{w}}^k, \mathbf{w}) & \triangleq S(\bar{\mathbf{x}}^k, \mathbf{y}) - S(\mathbf{x}, \bar{\mathbf{y}}^k) \\
& = (f(\bar{\mathbf{x}}^k) - f(\mathbf{x})) + (g(\bar{\mathbf{x}}^k) - g(\mathbf{x})) + (\langle \mathbf{A}\bar{\mathbf{x}}^k, \mathbf{y} \rangle - \langle \mathbf{A}\mathbf{x}, \bar{\mathbf{y}}^k \rangle) + (h^*(\bar{\mathbf{y}}^k) - h^*(\mathbf{y})).
\end{aligned} \tag{S-23}$$

Then for any  $\mathbf{x} \in \mathbb{R}^d$  and  $\mathbf{y} \in \mathbb{R}^m$ ,

$$\begin{aligned}
& \beta_k Q(\bar{\mathbf{w}}^{k+1}, \mathbf{w}) \\
& \stackrel{(S-20),(8),(9)}{\leq} (\beta_k - 1) (f(\bar{\mathbf{x}}^k) - f(\mathbf{x})) + \frac{L}{2\beta_k} \|\mathbf{x}^{k+1} - \mathbf{x}^k\|^2 + \langle \nabla f(\tilde{\mathbf{x}}^k), \mathbf{x}^{k+1} - \mathbf{x} \rangle \\
& \quad + (\beta_k - 1) (\langle \mathbf{A}\bar{\mathbf{x}}^k, \mathbf{y} \rangle - \langle \mathbf{A}\mathbf{x}, \bar{\mathbf{y}}^k \rangle) + (\langle \mathbf{A}\mathbf{x}^{k+1}, \mathbf{y} \rangle - \langle \mathbf{A}\mathbf{x}, \mathbf{y}^{k+1} \rangle) \\
& \quad + \beta_k (g(\bar{\mathbf{x}}^{k+1}) - g(\mathbf{x})) + \beta_k (h^*(\bar{\mathbf{y}}^{k+1}) - h^*(\mathbf{y})) \\
& \stackrel{(S-21),(S-22)}{\leq} (\beta_k - 1) (f(\bar{\mathbf{x}}^k) - f(\mathbf{x})) + (\beta_k - 1) (g(\bar{\mathbf{x}}^k) - g(\mathbf{x})) + (\beta_k - 1) (\langle \mathbf{A}\bar{\mathbf{x}}^k, \mathbf{y} \rangle - \langle \mathbf{A}\mathbf{x}, \bar{\mathbf{y}}^k \rangle) \\
& \quad + (\beta_k - 1) (h^*(\bar{\mathbf{y}}^k) - h^*(\mathbf{y})) + \frac{L}{2\beta_k} \|\mathbf{x}^{k+1} - \mathbf{x}^k\|^2 + \langle \nabla f(\tilde{\mathbf{x}}^k), \mathbf{x}^{k+1} - \mathbf{x} \rangle \\
& \quad + (\langle \mathbf{A}\mathbf{x}^{k+1}, \mathbf{y} \rangle - \langle \mathbf{A}\mathbf{x}, \mathbf{y}^{k+1} \rangle) + (g(\mathbf{x}^{k+1}) - g(\mathbf{x})) + (h^*(\mathbf{y}^{k+1}) - h^*(\mathbf{y})) \\
& \stackrel{(S-23),(S-17),(S-18)}{\leq} (\beta_k - 1) Q(\bar{\mathbf{w}}^k, \mathbf{w}) + \frac{L}{2\beta_k} \|\mathbf{x}^{k+1} - \mathbf{x}^k\|^2 + \langle \mathbf{A}\mathbf{x}^{k+1}, \mathbf{y} - \mathbf{y}^{k+1} \rangle \\
& \quad + \frac{1}{2\tau_k} (\|\mathbf{x}^k - \mathbf{x}\|^2 - \|\mathbf{x}^k - \mathbf{x}^{k+1}\|^2 - \|\mathbf{x}^{k+1} - \mathbf{x}\|^2) + \langle \boldsymbol{\varepsilon}^k, \mathbf{x} - \mathbf{x}^{k+1} \rangle \\
& \quad + \frac{1}{2\alpha_k} (\|\mathbf{y}^k - \mathbf{y}\|^2 - \|\mathbf{y}^k - \mathbf{y}^{k+1}\|^2 - \|\mathbf{y}^{k+1} - \mathbf{y}\|^2) + \langle \mathbf{A}\mathbf{z}^k, \mathbf{y}^{k+1} - \mathbf{y} \rangle \\
& \stackrel{(7)}{\leq} (\beta_k - 1) Q(\bar{\mathbf{w}}^k, \mathbf{w}) + \left( \frac{L}{2\beta_k} - \frac{1}{2\tau_k} \right) \|\mathbf{x}^{k+1} - \mathbf{x}^k\|^2 + \frac{1}{2\tau_k} (\|\mathbf{x}^k - \mathbf{x}\|^2 - \|\mathbf{x}^{k+1} - \mathbf{x}\|^2) \\
& \quad + \langle \mathbf{A}(\mathbf{x}^k - \mathbf{x}^{k+1}), \mathbf{y}^{k+1} - \mathbf{y} \rangle + \theta_k \langle \mathbf{A}(\mathbf{x}^k - \mathbf{x}^{k-1}), \mathbf{y}^k - \mathbf{y} \rangle + \theta_k \langle \mathbf{A}(\mathbf{x}^k - \mathbf{x}^{k-1}), \mathbf{y}^{k+1} - \mathbf{y}^k \rangle \\
& \quad + \frac{1}{2\alpha_k} (\|\mathbf{y}^k - \mathbf{y}\|^2 - \|\mathbf{y}^{k+1} - \mathbf{y}\|^2) - \frac{1}{2\alpha_k} \|\mathbf{y}^k - \mathbf{y}^{k+1}\|^2 + \langle \boldsymbol{\varepsilon}^k, \mathbf{x} - \mathbf{x}^{k+1} \rangle.
\end{aligned} \tag{S-24}$$

Define  $\gamma_{-1} \triangleq 1$ . From the definition of  $\{\gamma_k\}_{k \in \mathbb{Z}^+}$ , we see that  $\gamma_{k-1} = \gamma_k \theta_k$ , for any  $k \in \mathbb{Z}^+$ . Now, we multiply both sides of (S-24) by  $\gamma_k$  and use condition (19) to obtain

$$\begin{aligned}
& \beta_k \gamma_k Q(\bar{\mathbf{w}}^{k+1}, \mathbf{w}) \\
& \leq \beta_{k-1} \gamma_{k-1} Q(\bar{\mathbf{w}}^k, \mathbf{w}) + \gamma_k \left( \frac{L}{2\beta_k} - \frac{1}{2\tau_k} \right) \|\mathbf{x}^{k+1} - \mathbf{x}^k\|^2 + \frac{\gamma_k}{2\tau_k} (\|\mathbf{x}^k - \mathbf{x}\|^2 - \|\mathbf{x}^{k+1} - \mathbf{x}\|^2) \\
& + \gamma_k \langle \mathbf{A}(\mathbf{x}^k - \mathbf{x}^{k+1}), \mathbf{y}^{k+1} - \mathbf{y} \rangle + \gamma_{k-1} \langle \mathbf{A}(\mathbf{x}^k - \mathbf{x}^{k-1}), \mathbf{y}^k - \mathbf{y} \rangle + \gamma_{k-1} \langle \mathbf{A}(\mathbf{x}^k - \mathbf{x}^{k-1}), \mathbf{y}^{k+1} - \mathbf{y}^k \rangle \\
& + \frac{\gamma_k}{2\alpha_k} (\|\mathbf{y}^k - \mathbf{y}\|^2 - \|\mathbf{y}^{k+1} - \mathbf{y}\|^2) - \frac{\gamma_k}{2\alpha_k} \|\mathbf{y}^k - \mathbf{y}^{k+1}\|^2 + \gamma_k \langle \boldsymbol{\varepsilon}^k, \mathbf{x} - \mathbf{x}^{k+1} \rangle. \tag{S-25}
\end{aligned}$$

By Young's inequality and that  $\|\mathbf{A}\| = B$ , we have

$$\gamma_{k-1} \langle \mathbf{A}(\mathbf{x}^k - \mathbf{x}^{k-1}), \mathbf{y}^{k+1} - \mathbf{y}^k \rangle \leq \frac{B^2 \theta_k^2 \alpha_k \gamma_k}{2} \|\mathbf{x}^k - \mathbf{x}^{k-1}\|^2 + \frac{\gamma_k}{2\alpha_k} \|\mathbf{y}^{k+1} - \mathbf{y}^k\|^2. \tag{S-26}$$

Substituting (S-26) into (S-25), we have

$$\begin{aligned}
& \beta_k \gamma_k Q(\bar{\mathbf{w}}^{k+1}, \mathbf{w}) - \beta_{k-1} \gamma_{k-1} Q(\bar{\mathbf{w}}^k, \mathbf{w}) \\
& \leq \frac{B^2 \theta_k^2 \alpha_k \gamma_k}{2} \|\mathbf{x}^k - \mathbf{x}^{k-1}\|^2 - \gamma_k \left( \frac{1}{2\tau_k} - \frac{L}{2\beta_k} \right) \|\mathbf{x}^{k+1} - \mathbf{x}^k\|^2 + \frac{\gamma_k}{2\tau_k} (\|\mathbf{x}^k - \mathbf{x}\|^2 - \|\mathbf{x}^{k+1} - \mathbf{x}\|^2) \\
& + \gamma_{k-1} \langle \mathbf{A}(\mathbf{x}^k - \mathbf{x}^{k-1}), \mathbf{y}^k - \mathbf{y} \rangle - \gamma_k \langle \mathbf{A}(\mathbf{x}^{k+1} - \mathbf{x}^k), \mathbf{y}^{k+1} - \mathbf{y} \rangle \\
& + \frac{\gamma_k}{2\alpha_k} (\|\mathbf{y}^k - \mathbf{y}\|^2 - \|\mathbf{y}^{k+1} - \mathbf{y}\|^2) + \gamma_k \langle \boldsymbol{\varepsilon}^k, \mathbf{x} - \mathbf{x}^{k+1} \rangle. \tag{S-27}
\end{aligned}$$

For any fixed  $K \in \mathbb{N}$ , we then telescope (S-27) over  $k = 0, \dots, K-1$  to obtain

$$\begin{aligned}
& \beta_{K-1} \gamma_{K-1} Q(\bar{\mathbf{w}}^K, \mathbf{w}) - \beta_{-1} \gamma_{-1} Q(\bar{\mathbf{w}}^0, \mathbf{w}) \leq \frac{B^2 \theta_0^2 \alpha_0 \gamma_0}{2} \|\mathbf{x}^0 - \mathbf{x}^{-1}\|^2 \\
& + \sum_{k=1}^{K-1} \frac{\gamma_{k-1}}{2} \left( B^2 \theta_k \alpha_k + \frac{L}{\beta_{k-1}} - \frac{1}{\tau_{k-1}} \right) \|\mathbf{x}^k - \mathbf{x}^{k-1}\|^2 - \frac{\gamma_{K-1}}{2} \left( \frac{1}{\tau_{K-1}} - \frac{L}{\beta_{K-1}} \right) \|\mathbf{x}^K - \mathbf{x}^{K-1}\|^2 \\
& + \frac{\gamma_0}{2\tau_0} \|\mathbf{x}^0 - \mathbf{x}\|^2 + \sum_{k=1}^{K-1} \left( \frac{\gamma_k}{2\tau_k} - \frac{\gamma_{k-1}}{2\tau_{k-1}} \right) \|\mathbf{x}^k - \mathbf{x}\|^2 - \frac{\gamma_{K-1}}{2\tau_{K-1}} \|\mathbf{x}^K - \mathbf{x}\|^2 \\
& + \frac{\gamma_0}{2\alpha_0} \|\mathbf{y}^0 - \mathbf{y}\|^2 + \sum_{k=1}^{K-1} \left( \frac{\gamma_k}{2\alpha_k} - \frac{\gamma_{k-1}}{2\alpha_{k-1}} \right) \|\mathbf{y}^k - \mathbf{y}\|^2 - \frac{\gamma_{K-1}}{2\alpha_{K-1}} \|\mathbf{y}^K - \mathbf{y}\|^2 \\
& + \gamma_{-1} \langle \mathbf{A}(\mathbf{x}^0 - \mathbf{x}^{-1}), \mathbf{y}^0 - \mathbf{y} \rangle - \gamma_{K-1} \langle \mathbf{A}(\mathbf{x}^K - \mathbf{x}^{K-1}), \mathbf{y}^K - \mathbf{y} \rangle + \sum_{k=0}^{K-1} \gamma_k \langle \boldsymbol{\varepsilon}^k, \mathbf{x} - \mathbf{x}^{k+1} \rangle. \tag{S-28}
\end{aligned}$$

Since  $\mathbf{z}^0 = \mathbf{x}^0$  and  $\theta_0 > 0$ , we have  $\mathbf{x}^{-1} = \mathbf{x}^0$ . In addition, from (19), we see that  $\beta_{-1} \gamma_{-1} = 0$ . By Young's inequality,

$$-\gamma_{K-1} \langle \mathbf{A}(\mathbf{x}^K - \mathbf{x}^{K-1}), \mathbf{y}^K - \mathbf{y} \rangle \leq \frac{B^2 \alpha_{K-1} \gamma_{K-1}}{2} \|\mathbf{x}^K - \mathbf{x}^{K-1}\|^2 + \frac{\gamma_{K-1}}{2\alpha_{K-1}} \|\mathbf{y}^K - \mathbf{y}\|^2. \tag{S-29}$$

By condition (20) and the boundedness of  $\text{dom } g$  and  $\text{dom } h^*$ , we have

$$\frac{\gamma_0}{2\tau_0} \|\mathbf{x}^0 - \mathbf{x}\|^2 + \sum_{k=1}^{K-1} \left( \frac{\gamma_k}{2\tau_k} - \frac{\gamma_{k-1}}{2\tau_{k-1}} \right) \|\mathbf{x}^k - \mathbf{x}\|^2 \leq \frac{\gamma_{K-1}}{2\tau_{K-1}} D_g^2, \tag{S-30}$$

$$\frac{\gamma_0}{2\alpha_0} \|\mathbf{y}^0 - \mathbf{y}\|^2 + \sum_{k=1}^{K-1} \left( \frac{\gamma_k}{2\alpha_k} - \frac{\gamma_{k-1}}{2\alpha_{k-1}} \right) \|\mathbf{y}^k - \mathbf{y}\|^2 \leq \frac{\gamma_{K-1}}{2\alpha_{K-1}} D_{h^*}^2. \tag{S-31}$$

By condition (20), we also have  $\theta_k \alpha_k \leq \alpha_{k-1}$ , for any  $k \in \mathbb{N}$ . Thus, (S-28) now becomes

$$\begin{aligned} \beta_{K-1} \gamma_{K-1} Q(\bar{\mathbf{w}}^K, \mathbf{w}) &\leq \sum_{k=1}^K \frac{\gamma_{k-1}}{2} \left( B^2 \alpha_{k-1} + \frac{L}{\beta_{k-1}} - \frac{1}{\tau_{k-1}} \right) \|\mathbf{x}^k - \mathbf{x}^{k-1}\|^2 \\ &+ \frac{\gamma_{K-1}}{2\tau_{K-1}} D_g^2 - \frac{\gamma_{K-1}}{2\tau_{K-1}} \|\mathbf{x}^K - \mathbf{x}\|^2 + \frac{\gamma_{K-1}}{2\alpha_{K-1}} D_{h^*}^2 + \sum_{k=0}^{K-1} \gamma_k \langle \boldsymbol{\varepsilon}^k, \mathbf{x} - \mathbf{x}^{k+1} \rangle. \end{aligned} \quad (\text{S-32})$$

Now, we decompose the last term in (S-32) into three parts, i.e.,

$$\sum_{k=0}^{K-1} \gamma_k \langle \boldsymbol{\varepsilon}^k, \mathbf{x} - \mathbf{x}^{k+1} \rangle = \sum_{k=0}^{K-1} \gamma_k \langle \boldsymbol{\varepsilon}^k, \mathbf{x} - \mathbf{x}_{\natural}^k \rangle + \sum_{k=0}^{K-1} \gamma_k \langle \boldsymbol{\varepsilon}^k, \mathbf{x}_{\natural}^k - \mathbf{x}^k \rangle + \sum_{k=0}^{K-1} \gamma_k \langle \boldsymbol{\varepsilon}^k, \mathbf{x}^k - \mathbf{x}^{k+1} \rangle, \quad (\text{S-33})$$

where  $\{\mathbf{x}_{\natural}^k\}_{k \in \mathbb{Z}^+}$  is defined as in Lemma S-1 with  $\vartheta_k = \tau_k$ , for any  $k \in \mathbb{Z}^+$ . By Lemma S-1, we have

$$\begin{aligned} \sum_{k=0}^{K-1} \gamma_k \langle \boldsymbol{\varepsilon}^k, \mathbf{x} - \mathbf{x}_{\natural}^k \rangle &\leq \frac{\gamma_0}{2\tau_0} \|\mathbf{x}_{\natural}^0 - \mathbf{x}\|^2 + \sum_{k=1}^{K-1} \left( \frac{\gamma_k}{2\tau_k} - \frac{\gamma_{k-1}}{2\tau_{k-1}} \right) \|\mathbf{x}_{\natural}^k - \mathbf{x}\|^2 + \sum_{k=0}^{K-1} \frac{\gamma_k \tau_k}{2} \|\boldsymbol{\varepsilon}^k\|^2 \\ &\leq \frac{\gamma_{K-1}}{2\tau_{K-1}} D_g^2 + \sum_{k=0}^{K-1} \frac{\gamma_k \tau_k}{2} \|\boldsymbol{\varepsilon}^k\|^2. \end{aligned} \quad (\text{S-34})$$

By Young's inequality, for any  $\zeta \in (0, 1)$ ,

$$\sum_{k=0}^{K-1} \gamma_k \langle \boldsymbol{\varepsilon}^k, \mathbf{x}^k - \mathbf{x}^{k+1} \rangle \leq \sum_{k=0}^{K-1} \frac{\gamma_k \tau_k}{2\zeta} \|\boldsymbol{\varepsilon}^k\|^2 + \sum_{k=1}^K \frac{\zeta \gamma_{k-1}}{2\tau_{k-1}} \|\mathbf{x}^k - \mathbf{x}^{k-1}\|^2. \quad (\text{S-35})$$

Substitute (S-33), (S-34) and (S-35) into (S-32), we then have

$$\begin{aligned} \beta_{K-1} \gamma_{K-1} Q(\bar{\mathbf{w}}^K, \mathbf{w}) &\leq \sum_{k=1}^K \frac{\gamma_{k-1}}{2} \left( B^2 \alpha_{k-1} + \frac{L}{\beta_{k-1}} - \frac{1-\zeta}{\tau_{k-1}} \right) \|\mathbf{x}^k - \mathbf{x}^{k-1}\|^2 \\ &+ \frac{\gamma_{K-1}}{\tau_{K-1}} D_g^2 + \frac{\gamma_{K-1}}{2\alpha_{K-1}} D_{h^*}^2 + \sum_{k=0}^{K-1} \gamma_k \langle \boldsymbol{\varepsilon}^k, \mathbf{x}_{\natural}^k - \mathbf{x}^k \rangle + \frac{1+\zeta}{2\zeta} \sum_{k=0}^{K-1} \gamma_k \tau_k \|\boldsymbol{\varepsilon}^k\|^2. \end{aligned} \quad (\text{S-36})$$

Apply condition (21) to (S-36) followed by taking supremum over  $\mathbf{w} \in \mathbf{dom} g \times \mathbf{dom} h^*$ , we then obtain (S-3).

## S-5 Convergence Analysis of Algorithm 2

We now focus on Problem (16). For any  $\mathbf{x} \in \mathbb{R}^d$  and  $\hat{\mathbf{y}} \in \mathbb{R}^m$ , define the primal-dual gap

$$\widehat{G}(\mathbf{x}, \mathbf{y}_1, \dots, \mathbf{y}_p) \triangleq \sup_{(\mathbf{y}'_1, \dots, \mathbf{y}'_p) \in \mathbf{dom} H^*} \widehat{S}(\mathbf{x}, \mathbf{y}'_1, \dots, \mathbf{y}'_p) - \inf_{\mathbf{x}' \in \mathbf{dom} g} \widehat{S}(\mathbf{x}', \mathbf{y}_1, \dots, \mathbf{y}_p).$$

Based on Theorem 1 (and Remark 9), we can obtain the following convergence results for Algorithm 2, by noting that  $\mathbf{dom} H^* = \prod_{i=1}^p \mathbf{dom} h_i^*$ ,  $D_{H^*} = (\sum_{i=1}^p D_{h_i^*}^2)^{1/2}$  and  $\|\widehat{\mathbf{A}}\| = (\sum_{i=1}^p B_i^2)^{1/2} \triangleq \widehat{B}$ .

**Corollary S-1.** *Let  $\mathbf{dom} g$  be compact and  $\mathbf{dom} h_i^*$  be bounded for each  $i \in [p]$ . In Algorithm 2, choose  $\{\beta_k\}_{k \in \mathbb{Z}^+}$ ,  $\{\alpha_k\}_{k \in \mathbb{Z}^+}$ ,  $\{\tau_k\}_{k \in \mathbb{Z}^+}$  and  $\{\theta_k\}_{k \in \mathbb{Z}^+}$  as in (11) and (12), and constants  $\rho' = D_{H^*}/(2D_g)$  and  $\rho = 1/D_g$ . If (A1) and (A2) hold, then for any  $K \in \mathbb{N}$ ,*

$$\mathbb{E}_{\Xi_K} \left[ \widehat{G}(\bar{\mathbf{x}}^K, \bar{\mathbf{y}}_1^K, \dots, \bar{\mathbf{y}}_p^K) \right] \leq 8LD_g^2/[K(K+3)] + 4\widehat{B}D_g D_{H^*}/K + 12\sigma D_g/\sqrt{K+3}. \quad (\text{S-37})$$

In addition, if (A1) and (A3) hold, then for any  $\delta \in (0, 1)$ ,

$$\widehat{G}(\bar{\mathbf{x}}^K, \bar{\mathbf{y}}_1^K, \dots, \bar{\mathbf{y}}_p^K) \leq 8LD_g^2/[K(K+3)] + 4\widehat{B}D_g D_{H^*}/K + 32\sigma \sqrt{\log(2/\delta)} D_g/\sqrt{K+3}$$

w.p. at least  $1 - \delta$ .

## S-6 Proof of Important Steps in Section 4.2

We first prove step (41). From (30), we have

$$\begin{aligned}
\boldsymbol{\omega}^{k+1} &= \arg \min_{\boldsymbol{\omega} \in \text{dom } h} h(\boldsymbol{\omega}) - \langle \boldsymbol{\lambda}^k, \mathbf{A}\mathbf{u}^k - \boldsymbol{\omega} \rangle + \frac{\varrho}{2} \|\mathbf{A}\mathbf{u}^k - \boldsymbol{\omega}\|^2 \\
&= \arg \min_{\boldsymbol{\omega} \in \text{dom } h} h(\boldsymbol{\omega}) + \frac{\varrho}{2} \|\mathbf{A}\mathbf{u}^k - \boldsymbol{\omega} - \boldsymbol{\lambda}^k / \varrho\|^2 \\
&= \text{prox}_{h/\varrho}(\mathbf{A}\mathbf{u}^k - \boldsymbol{\lambda}^k / \varrho) \\
&= \mathbf{A}\mathbf{u}^k - \frac{1}{\varrho} (\boldsymbol{\lambda}^k + \text{prox}_{\varrho h^*}(\varrho \mathbf{A}\mathbf{u}^k - \boldsymbol{\lambda}^k)) = \mathbf{A}\mathbf{u}^k - \frac{1}{\varrho} (\boldsymbol{\lambda}^k + \mathbf{y}_\diamond^{k+1}), \tag{S-38}
\end{aligned}$$

where in (S-38) we first use Moreau's identity in (17) and then the definition of  $\mathbf{y}_\diamond^{k+1}$  in (40).

Next, we show step (42). From (31), we have

$$\begin{aligned}
\mathbf{u}^{k+1} &= \arg \min_{\mathbf{u} \in \text{dom } g} g(\mathbf{u}) + \langle \mathbf{v}^k, \mathbf{u} - \mathbf{u}^k \rangle + \frac{r_k}{2\eta_k} \langle \mathbf{u} - \mathbf{u}^k, \mathbf{W}^k(\mathbf{u} - \mathbf{u}^k) \rangle + \frac{\varrho}{2} \|\mathbf{A}\mathbf{u} - \boldsymbol{\omega}^{k+1} - \boldsymbol{\lambda}^k / \varrho\|^2 \\
&\stackrel{(a)}{=} \arg \min_{\mathbf{u} \in \text{dom } g} g(\mathbf{u}) + \langle \mathbf{v}^k, \mathbf{u} - \mathbf{u}^k \rangle + \frac{r_k}{2\eta_k} \langle \mathbf{u} - \mathbf{u}^k, \mathbf{W}^k(\mathbf{u} - \mathbf{u}^k) \rangle + \frac{\varrho}{2} \|\mathbf{A}(\mathbf{u} - \mathbf{u}^k) + \mathbf{y}_\diamond^{k+1} / \varrho\|^2 \\
&= \arg \min_{\mathbf{u} \in \text{dom } g} g(\mathbf{u}) + \langle \mathbf{v}^k + \mathbf{A}^T \mathbf{y}_\diamond^{k+1}, \mathbf{u} - \mathbf{u}^k \rangle + \frac{r_k}{2\eta_k} \langle \mathbf{u} - \mathbf{u}^k, (\mathbf{W}^k + (\eta_k / r_k) \varrho \mathbf{A}^T \mathbf{A})(\mathbf{u} - \mathbf{u}^k) \rangle \\
&\stackrel{(b)}{=} \arg \min_{\mathbf{u} \in \text{dom } g} g(\mathbf{u}) + \langle \mathbf{v}^k + \mathbf{A}^T \mathbf{y}_\diamond^{k+1}, \mathbf{u} - \mathbf{u}^k \rangle + \frac{1}{2\tilde{\eta}_k} \|\mathbf{u} - \mathbf{u}^k\|^2 \\
&= \arg \min_{\mathbf{u} \in \text{dom } g} g(\mathbf{u}) + \frac{1}{2\tilde{\eta}_k} \|\mathbf{u} - \mathbf{u}^k + \tilde{\eta}_k(\mathbf{v}^k + \mathbf{A}^T \mathbf{y}_\diamond^{k+1})\|^2 \\
&= \text{prox}_{\tilde{\eta}_k g}(\mathbf{u}^k - \tilde{\eta}_k(\mathbf{v}^k + \mathbf{A}^T \mathbf{y}_\diamond^{k+1})), \tag{S-39}
\end{aligned}$$

where in (a) we use (S-38) and in (b) we use the definition of  $\mathbf{W}^k$  in Section 4.2.

## References

- [1] A. Nemirovski, A. Juditsky, G. Lan, and A. Shapiro, "Robust stochastic approximation approach to stochastic programming," *SIAM J. Optim.*, vol. 19, no. 4, pp. 1574–1609, 2009.
- [2] H. Ouyang, N. He, L. Tran, and A. Gray, "Stochastic alternating direction method of multipliers," in *Proc. ICML*, (Atlanta, USA), pp. 80–88, 2013.
- [3] T. Suzuki, "Dual averaging and proximal gradient descent for online alternating direction multiplier method," in *Proc. ICML*, pp. 392–400, 2013.
- [4] S. Azadi and S. Sra, "Towards an optimal stochastic alternating direction method of multipliers," in *Proc. ICML*, (Beijing, China), pp. 620–628, 2014.
- [5] E. Esser, X. Zhang, and T. F. Chan, "A general framework for a class of first order primal-dual algorithms for convex optimization in imaging science," *SIAM J. Imaging Sci.*, vol. 3, no. 4, pp. 1015–1046, 2010.
- [6] S. Boyd, N. Parikh, E. Chu, B. Peleato, and J. Eckstein, "Distributed optimization and statistical learning via the alternating direction method of multipliers," *Found. Trends Mach. Learn.*, vol. 3, pp. 1–122, Jan. 2011.
- [7] M. Yan and W. Yin, *Self Equivalence of the Alternating Direction Method of Multipliers*, pp. 165–194. Springer International Publishing, 2016.
